# Supplementary material for: Hydrothermal in situ synthesis of Rb and S co-doped Ti-based TiO2 sheet with a thin film showing high photocatalytic activities
Source: Royal Society of Chemistry journal article supplement (doi:10.1039/c7ra12757j), 2018-01-01
Supplement: c7ra12757j1.pdf [file c7ra12757j1.pdf]

## **Supporting Information:**

### **Hydrothermal in situ synthesis of Rb and S co-doped Ti- based TiO<sub>2</sub> sheet with thin film showing high photocatalytic activities**

Yuhan Wang, Chunli Kang, Dongmei Huang, Kunkun Xiao, Ling Zhu, Fang Liu and Tao  
Tian\*

Key Laboratory of Groundwater Resources and Environment, Jilin University,  
Ministry of Education, Changchun, 130021, Jilin, P. R. China.

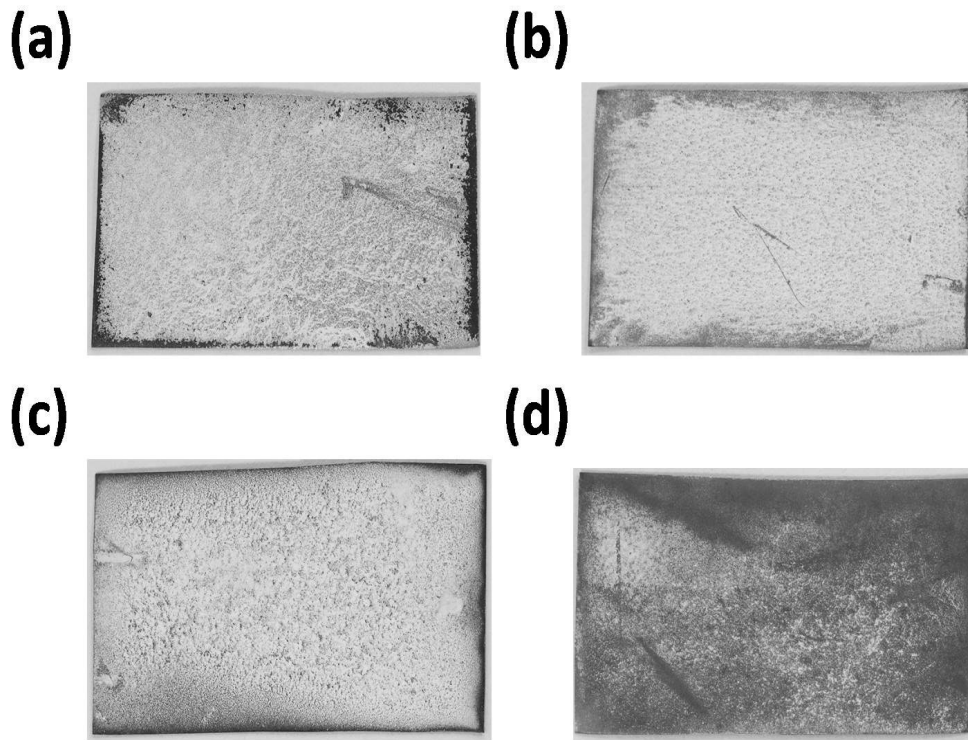

**Fig. S1** Images of the  $\text{Rb}_2\text{SO}_4$  modified film: (a)  $\text{Rb/S/TiO}_2$ -24, (b)  $\text{Rb/S/TiO}_2$ -30, (c)  $\text{Rb/S/TiO}_2$ -48, (d)  $\text{Rb/S/TiO}_2$ -72

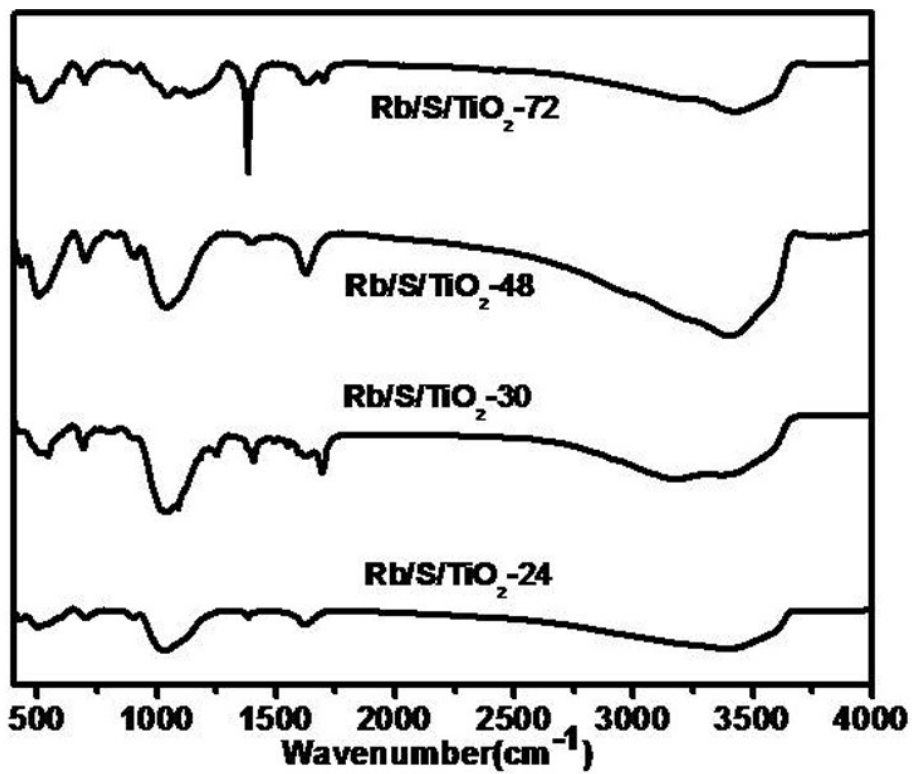

**Fig. S2** FT-IR spectra of  $\text{Rb}_2\text{SO}_4$  modified film.

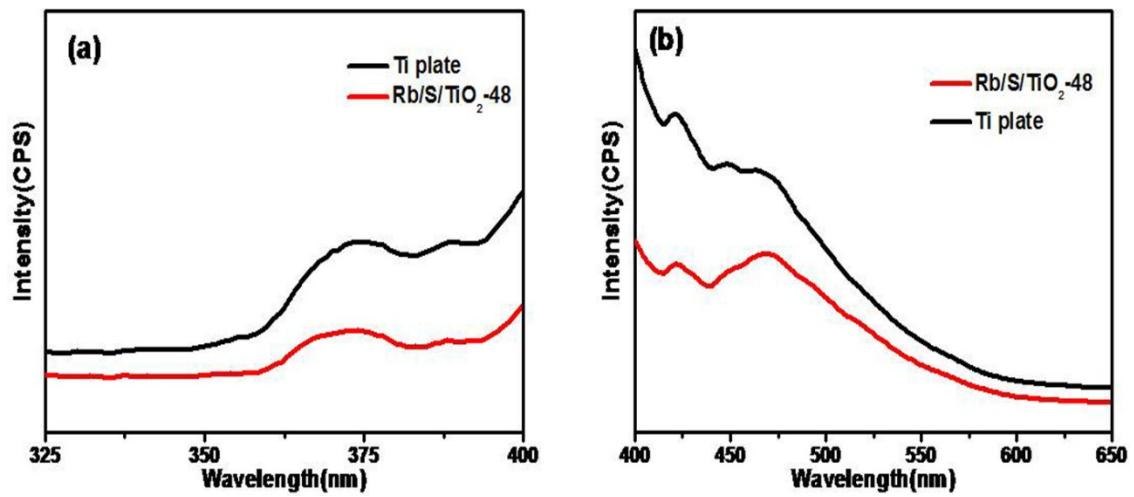

**Fig. S3** PL spectra of the samples: (a) Excitation Spectra and (b) Emission Spectra.

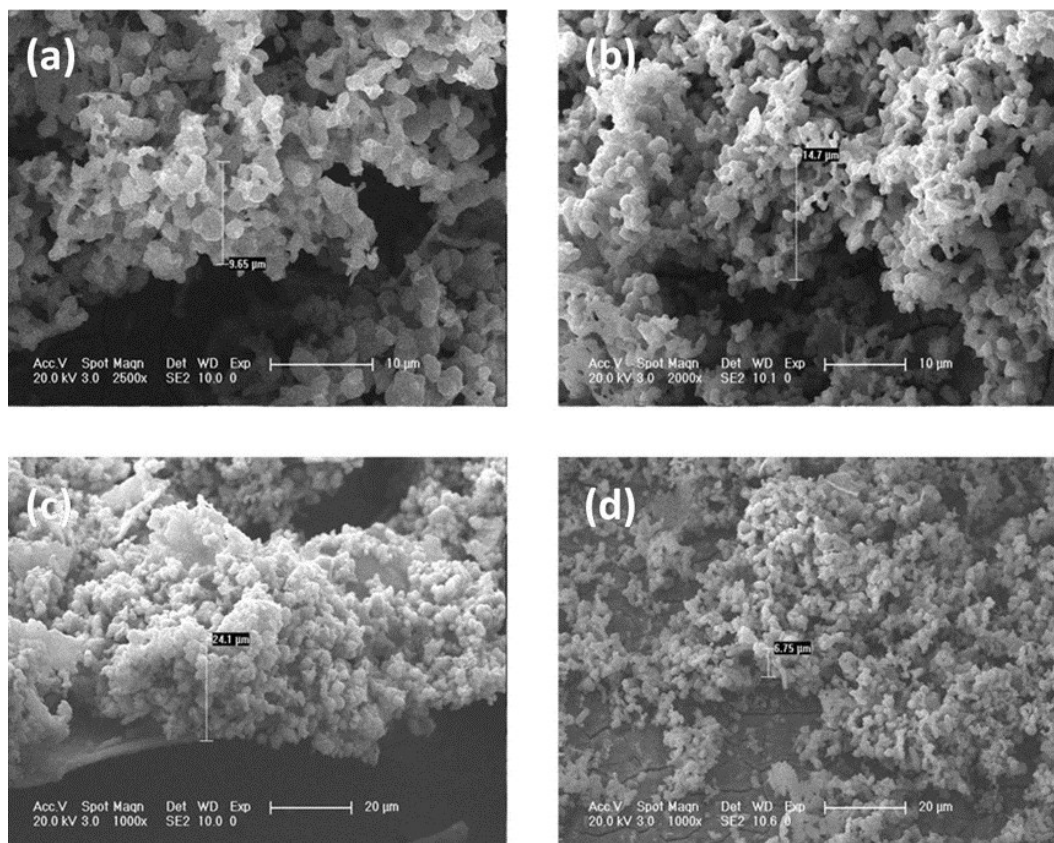

**Fig. S4** SEM images of cross section of the film: (a) Rb/S/TiO<sub>2</sub>-24, (b) Rb/S/TiO<sub>2</sub>-30, (c) Rb/S/TiO<sub>2</sub>-48, (d) Rb/S/TiO<sub>2</sub>-72.

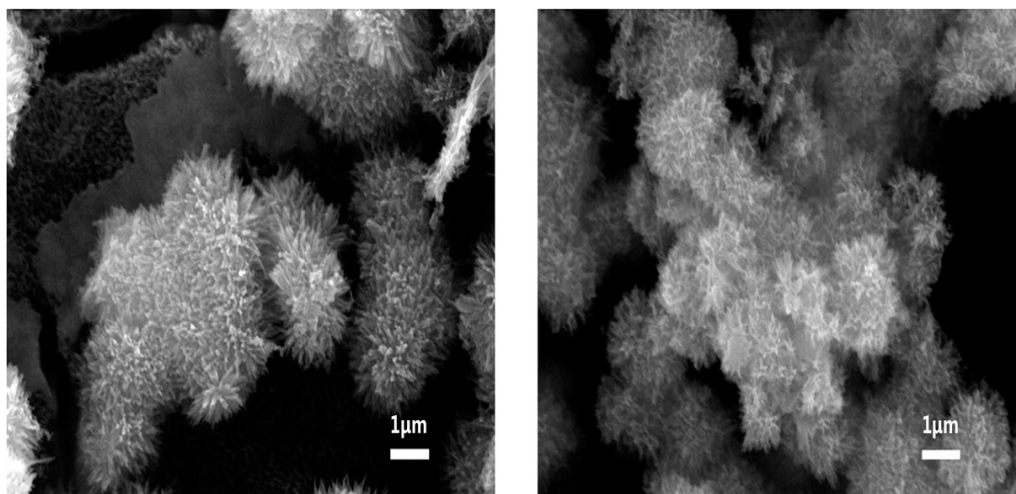

**Fig. S5** SEM images of (a) Rb/S/TiO<sub>2</sub>-24, (b) Rb/S/TiO<sub>2</sub>-30

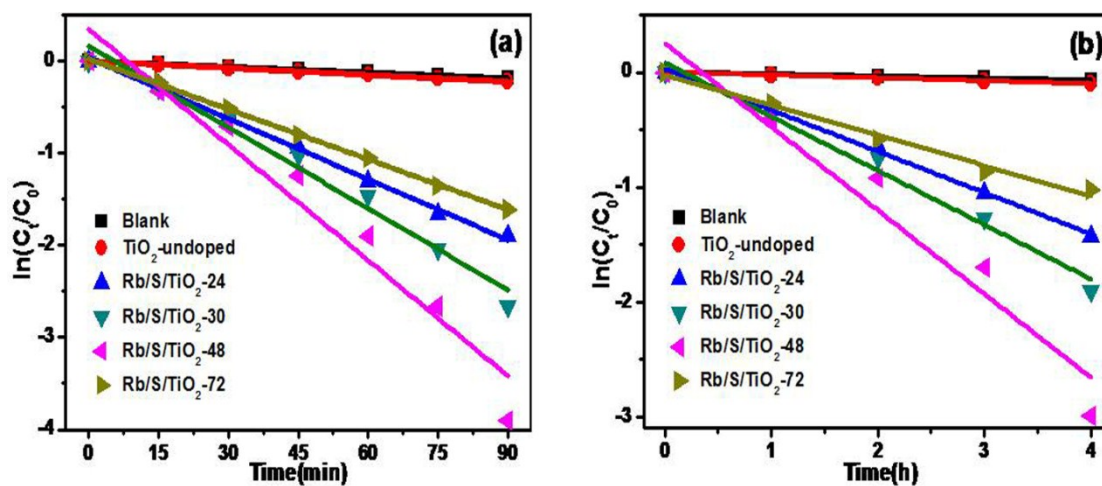

**Fig. S6** Kinetic linear simulation curves of samples for the removal of MO: (a) under UV light, (b) under simulated sunlight.

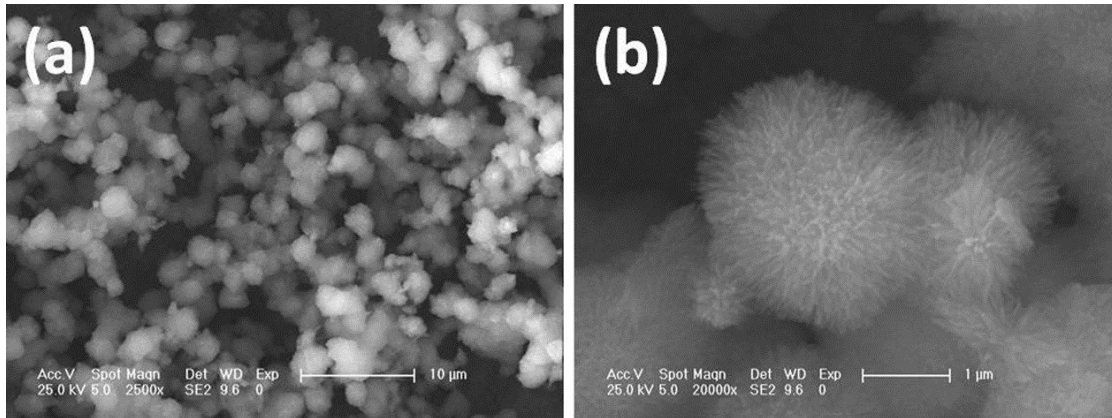

**Fig. S7** SEM images of Rb/S/TiO<sub>2</sub>-48 after being used for 3 times.

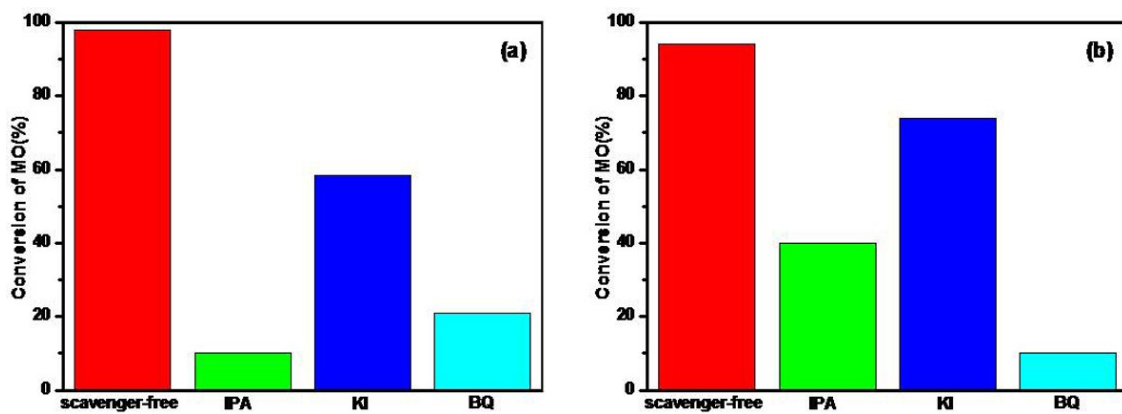

**Fig. S8** Photocatalytic degradation by Rb/S/TiO<sub>2</sub>-48 in the presence of IPA, KI and BQ under UV light: (a) MO for 90min, (b) MO with the presence of H<sub>2</sub>O<sub>2</sub> for 30min.

**Table S1** Detailed surface elemental composition of Rb/S/TiO<sub>2</sub>-24.

| Element | State | Relative Content (%) |
|---------|-------|----------------------|
| Ti      | Ti 2p | 16.7                 |
| S       | S 2p  | 3.25                 |
| Rb      | Rb 3d | 3.78                 |
| O       | O 1s  | 75.72                |
| N       | N 1s  | 0.15                 |
| C       | C 1s  | 0.4                  |

**Table S2** Detailed surface elemental composition of Rb/S/TiO<sub>2</sub>-30.

| Element | State | Relative Content (%) |
|---------|-------|----------------------|
| Ti      | Ti 2p | 16.46                |
| S       | S 2p  | 3.26                 |
| Rb      | Rb 3d | 3.76                 |
| O       | O 1s  | 75.92                |
| N       | N 1s  | 0.2                  |
| C       | C 1s  | 0.4                  |

**Table S3** Detailed surface elemental composition of Rb/S/TiO<sub>2</sub>-48.

| Element | State | Relative Content (%) |
|---------|-------|----------------------|
| Ti      | Ti 2p | 16.63                |
| S       | S 2p  | 3.2                  |
| Rb      | Rb 3d | 3.78                 |
| O       | O 1s  | 75.8                 |
| N       | N 1s  | 0.2                  |
| C       | C 1s  | 0.39                 |

**Table S4** Detailed surface elemental composition of Rb/S/TiO<sub>2</sub>-72.

| Element | State | Relative Content (%) |
|---------|-------|----------------------|
| Ti      | Ti 2p | 16.65                |
| S       | S 2p  | 3.3                  |
| Rb      | Rb 3d | 3.72                 |
| O       | O 1s  | 75.72                |
| N       | N 1s  | 0.2                  |
| C       | C 1s  | 0.41                 |

**Table S5** Scavengers studies for different reactive species in MO and 4-CP photodegradation.

| Target species        | Scavenger | Scavenger concentration (mM) |
|-----------------------|-----------|------------------------------|
| $\bullet\text{OH}$    | IPA       | 1                            |
| $\text{h}^+$          | KI        | 1                            |
| $\bullet\text{O}_2^-$ | BQ        | 1                            |
